# Supplementary material for: MIL-88A derived CoFe-layered double hydroxides with optimized composition for the enhanced electrocatalytic oxygen evolution reaction
Source: Royal Society of Chemistry journal article supplement (doi:10.1039/d2nj06061b), 2023-01-01
Supplement: d2nj06061b1.pdf [file d2nj06061b1.pdf]

## MIL-88A Derived CoFe-Layered Double Hydroxide with Optimized Composition for the Enhanced Electrocatalytic Oxygen Evolution Reaction

D. Taherinia<sup>a\*</sup>, M. Hajilo<sup>a</sup>, F. Mirzaee Valadi<sup>a</sup>

<sup>a</sup>Department of Chemistry, Sharif University of Technology, Tehran 11155-9516, Iran

\*taherinia@sharif.edu

### Table of Contents

|                                                                                               |   |
|-----------------------------------------------------------------------------------------------|---|
| <b>Figure S1.</b> XRD patterns of CoFe-LDH_1, CoFe-LDH_2, CoFe-LDH_4, and CoFe-LDH_5.....     | 2 |
| <b>Figure S2.</b> CV curves of MIL-88A and CoFe-LDHs in the nonfaradaic potential window..... | 3 |
| <b>Figure S3.</b> ECSA-normalized LSV curves .....                                            | 4 |
| <b>Figure S4.</b> Post-electrolysis FE-SEM images of CoFe-LDH_3 .....                         | 4 |

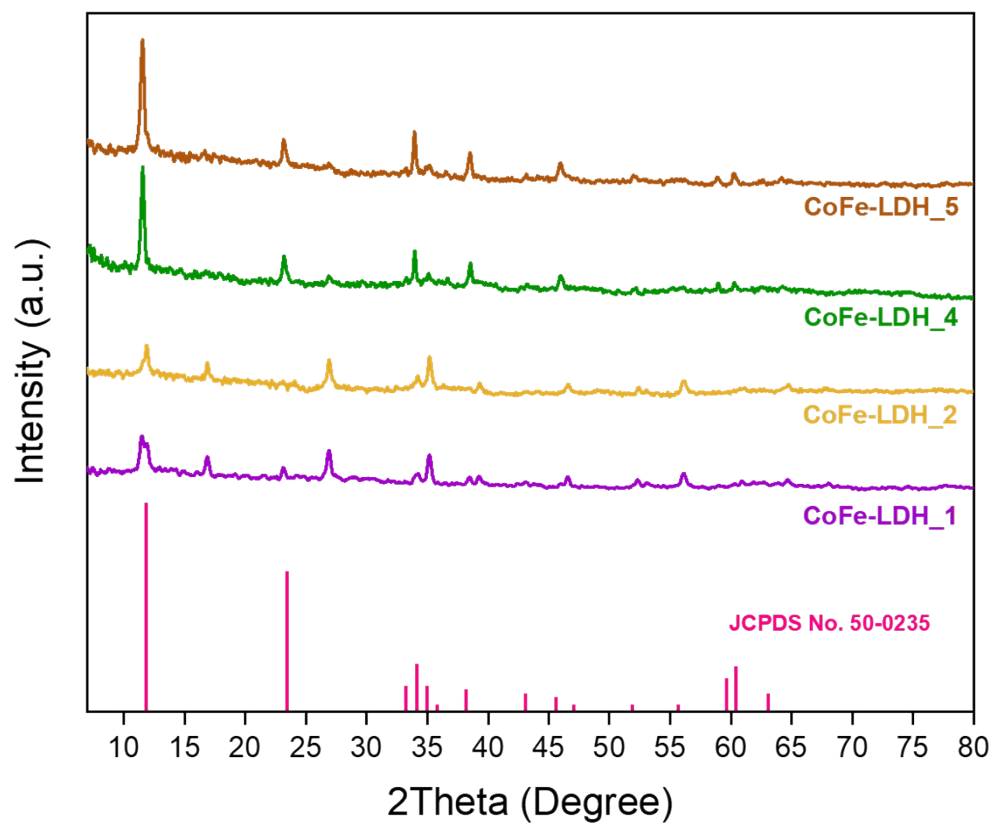

**Figure S1.** XRD patterns of the as-synthesized CoFe-LDH\_1, CoFe-LDH\_2, CoFe-LDH\_4, and CoFe-LDH\_5.

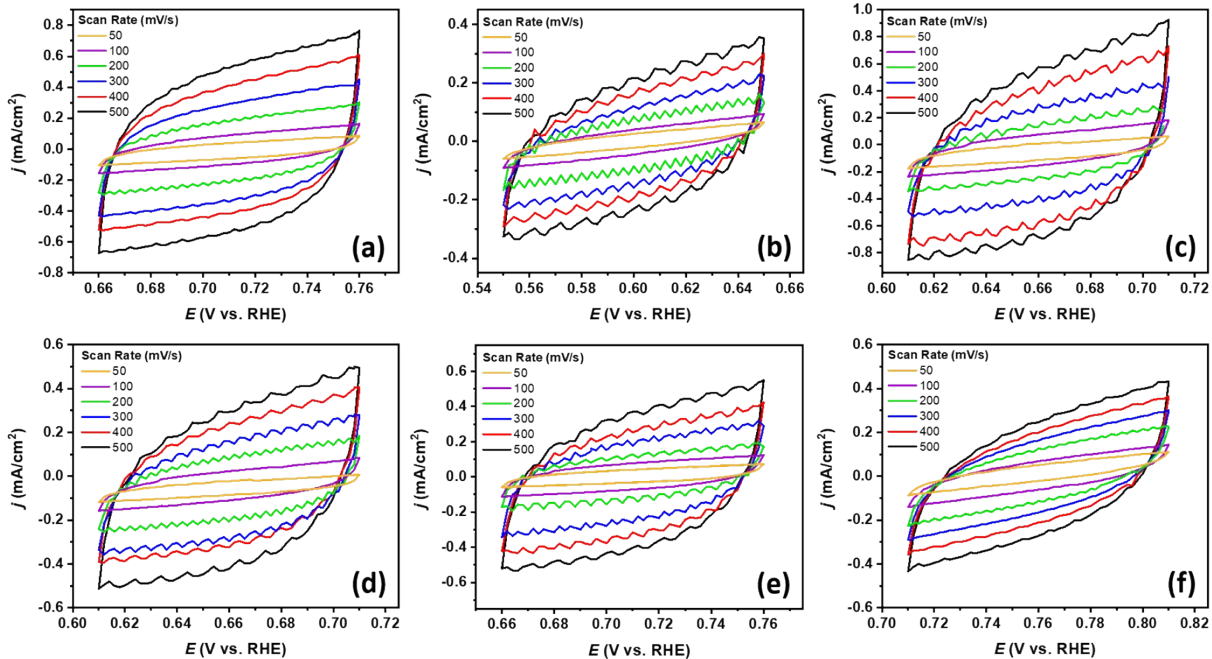

**Figure S2.** CV curves of (a) CoFe-LDH\_1, (b) CoFe-LDH\_2, (c) CoFe-LDH\_3, (d) CoFe-LDH\_4, (e) CoFe-LDH\_5, and (f) MIL88-A obtained in the nonfaradaic potential window at different scan rates in 1.0 M KOH.

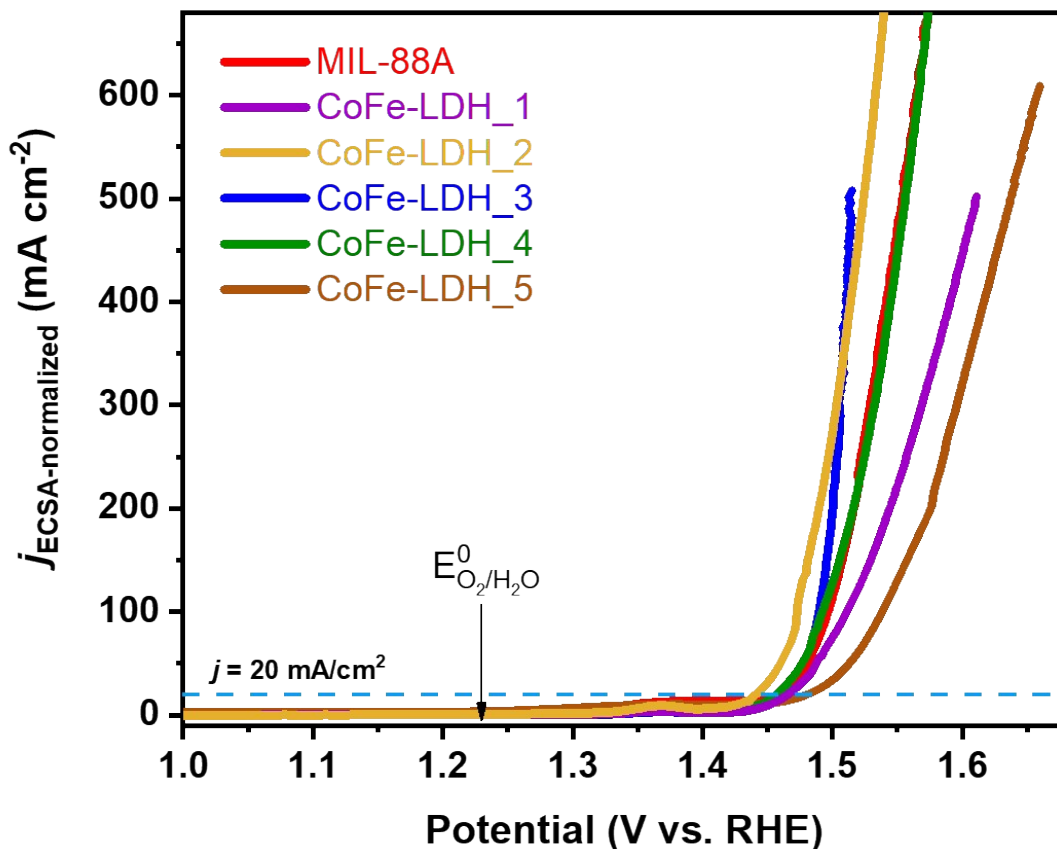

**Figure S3.** ECSA-normalized LSV curves of CoFe-LDH\_1, CoFe-LDH\_2, CoFe-LDH\_3, CoFe-LDH\_4, CoFe-LDH\_5, and MIL-88A calculated according to the data of Figures 5a and 7.

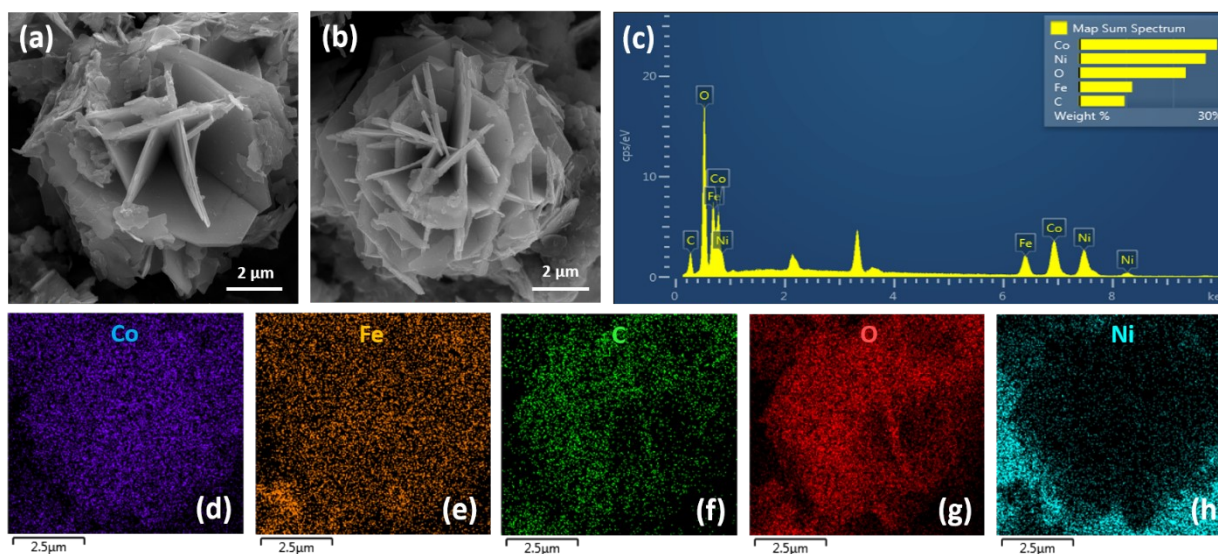

**Figure S4.** FESEM images (a, b), EDX spectrum (c), and elemental mapping images (d-h) of the CoFe-LDH\_3/NF after 10 h of electrolysis in 1.0 M KOH solution at the constant potential of 1.47 V (vs. RHE). The EDX spectrum and elemental mapping images correspond to the SEM image of the panel (a).
